# Supplementary material for: Polymer-Doped SnO2 as an Electron Transport Layer for Highly Efficient and Stable Perovskite Solar Cells
Source: MDPI journal article supplement (doi:10.3390/polym16020199), 2024-01-09
Supplement: s1 [file s1]

## SUPPORTING INFORMATION

### **Polymer-doped SnO<sub>2</sub> as an Electron Transport Layer for High-efficient and Stable Perovskite Solar Cells**

Vo Pham Hoang Huy and Chung Wung Bark\*

*Department of Electrical Engineering, Gachon University, Seongnam 13120, Gyeonggi,  
Republic of Korea;*

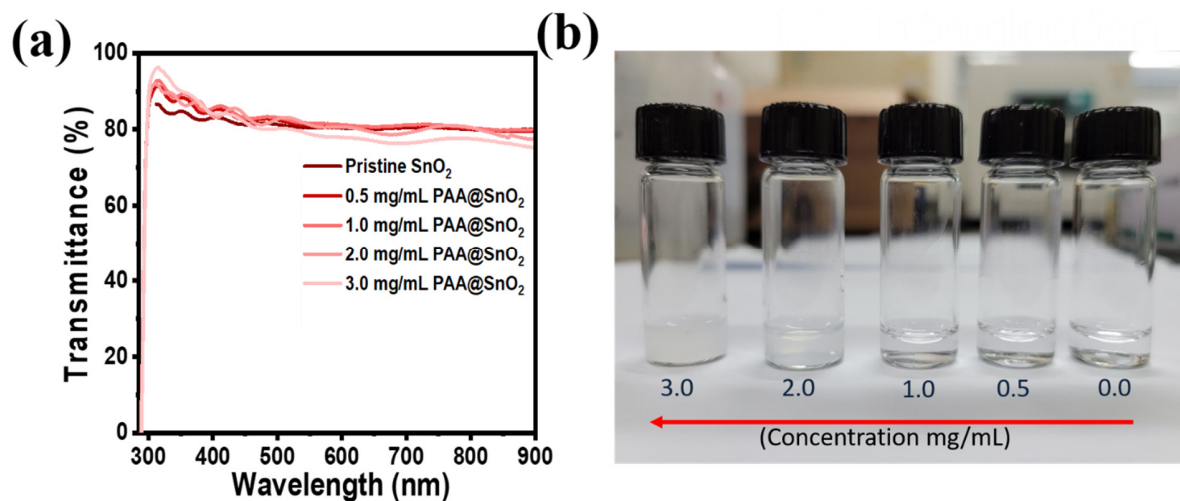

**Fig. S1.** (a) Transmission spectra of 0, 0.5, 1, 2, and 3.0  $\text{mg mL}^{-1}$  of  $\text{PAA@SnO}_2$  films coated onto FTO substrates. (b) Digital images of  $\text{SnO}_2$  and different concentrations of  $\text{PAA@SnO}_2$  precursor solutions.

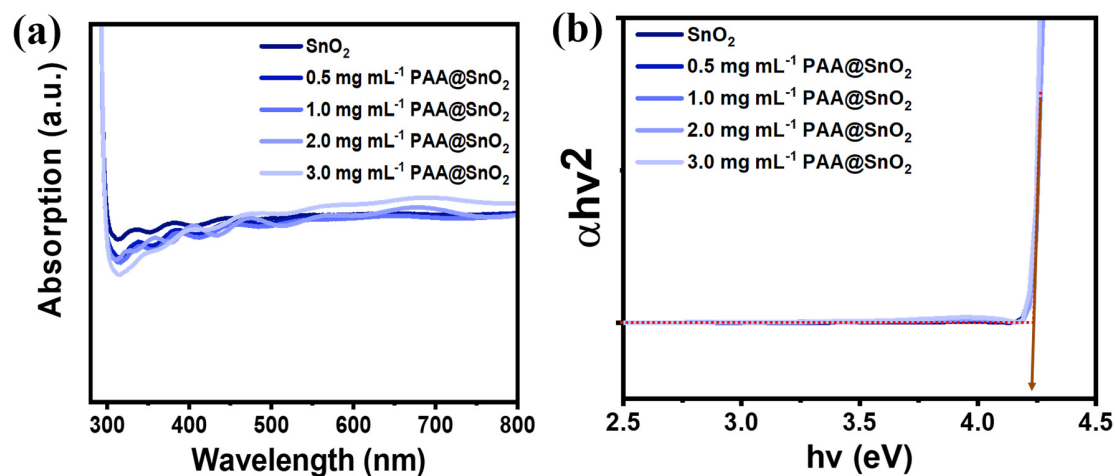

**Fig. S2.** (a) UV-Vis spectra of 0, 0.5, 1, 2, and 3.0  $\text{mg mL}^{-1}$  of  $\text{PAA@SnO}_2$  films coated on FTO substrates. (b) Tauc plot for  $\text{PAA@SnO}_2$

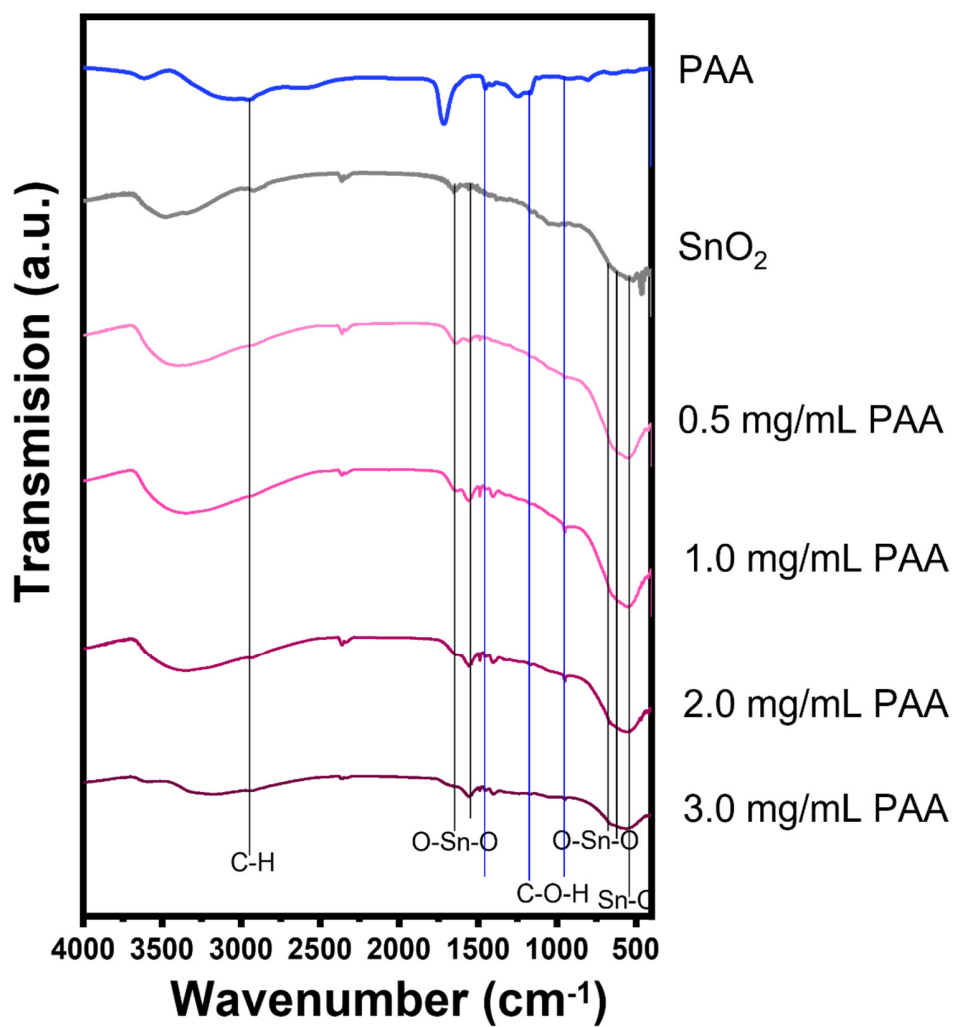

**Fig. S3.** FT-IR spectra of PAA, SnO<sub>2</sub>, and PAA@SnO<sub>2</sub> at different concentrations before annealing.

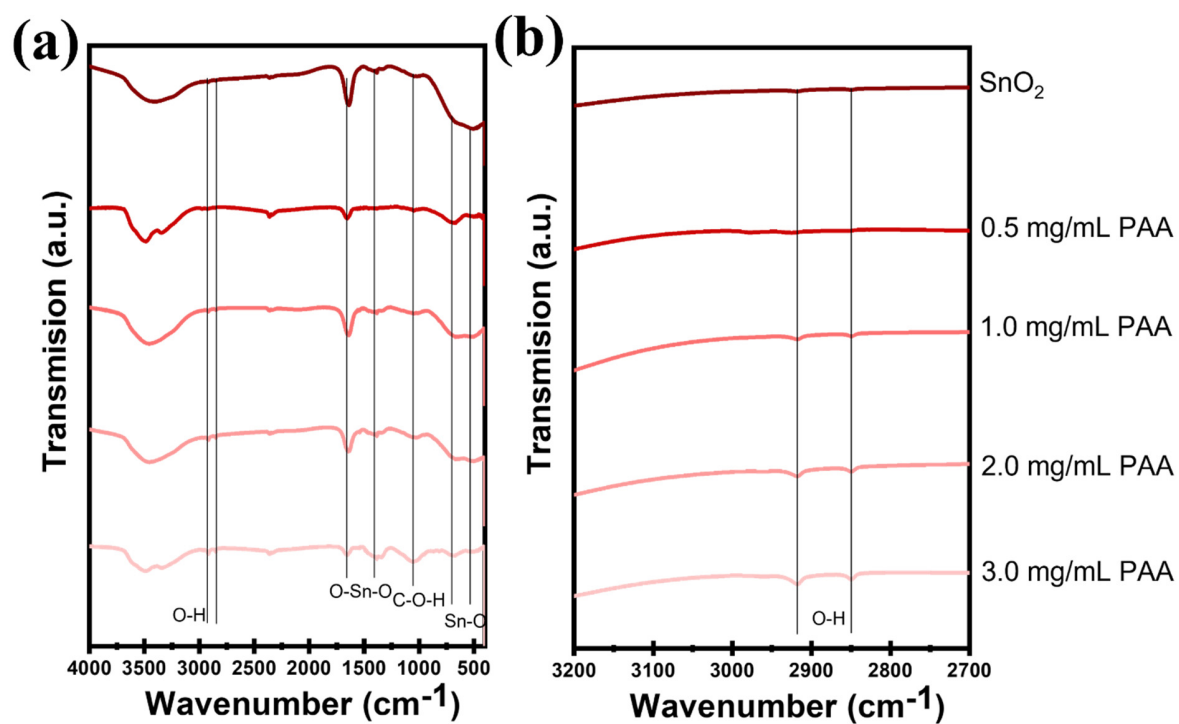

**Fig. S4.** FT-IR spectra of PAA, SnO<sub>2</sub>, and PAA@SnO<sub>2</sub> at different concentrations after annealing.

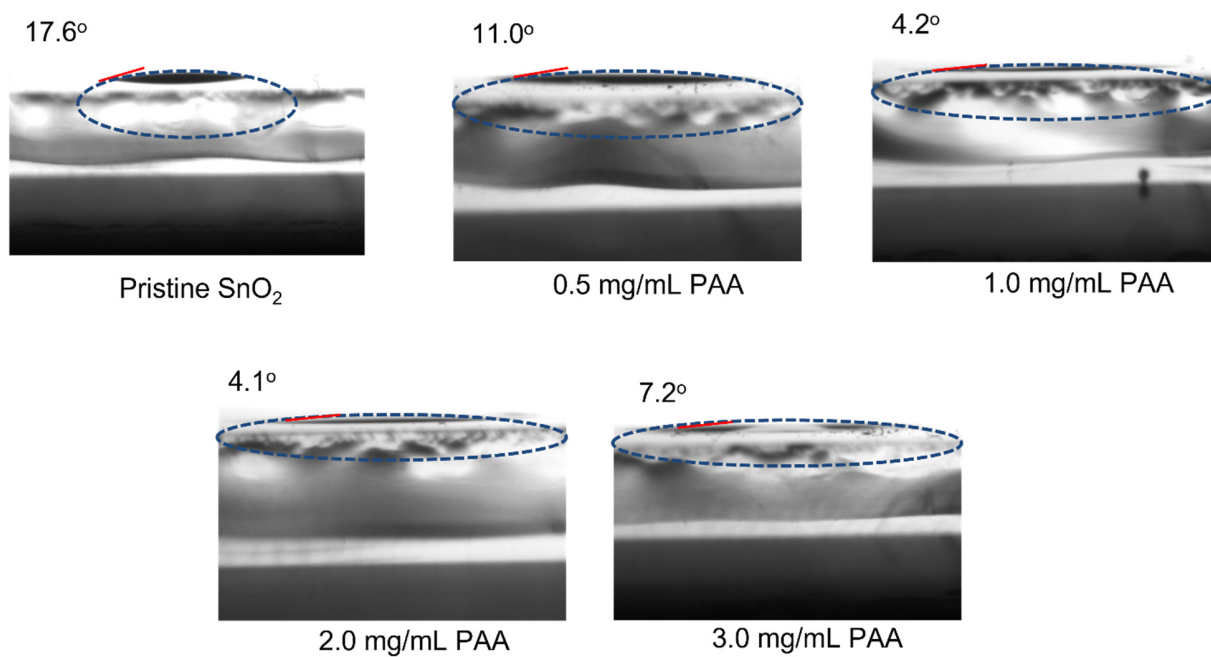

**Fig. S5.** Contact angle measurements of the SnO<sub>2</sub> films without and with different concentrations of the PAA polymer.

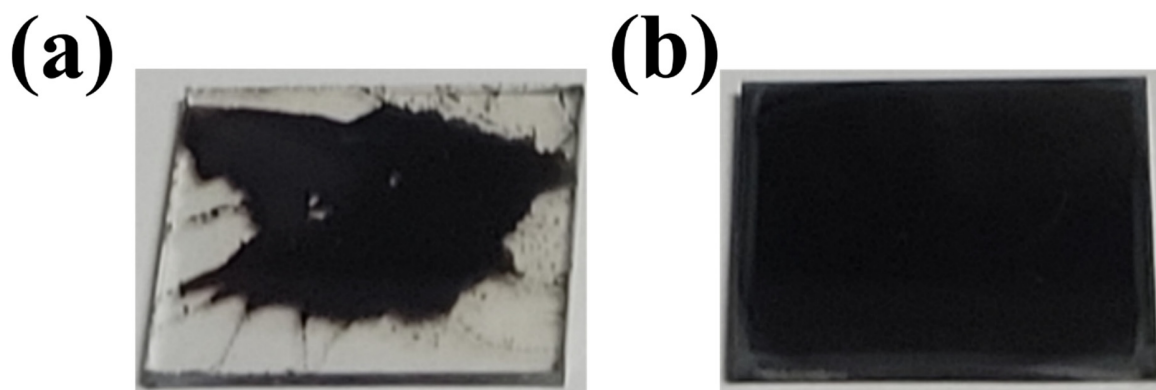

**Fig. S6.** Photograph of the perovskite film on (a)  $\text{SnO}_2$  with the UV treatment and (b)  $\text{PAA@SnO}_2$  with PAA concentration of 1 mg/mL substrate without the UV treatment.

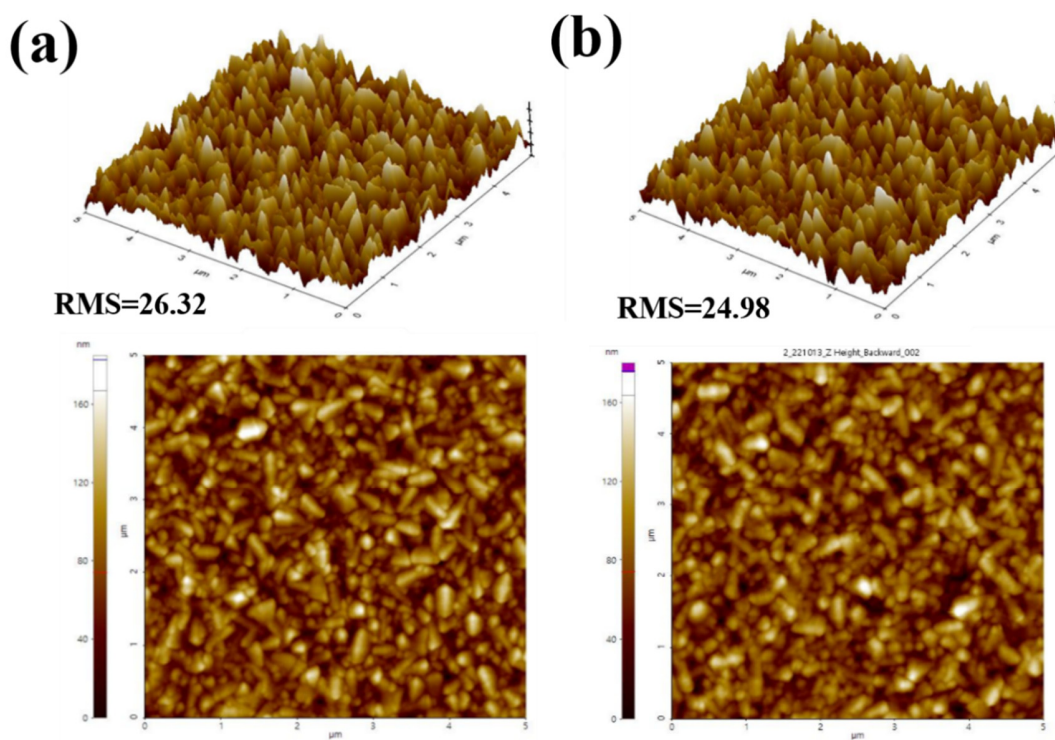

**Fig. S7.** AFM images of (a)  $\text{SnO}_2$  and (b)  $\text{PAA@SnO}_2$  layers.

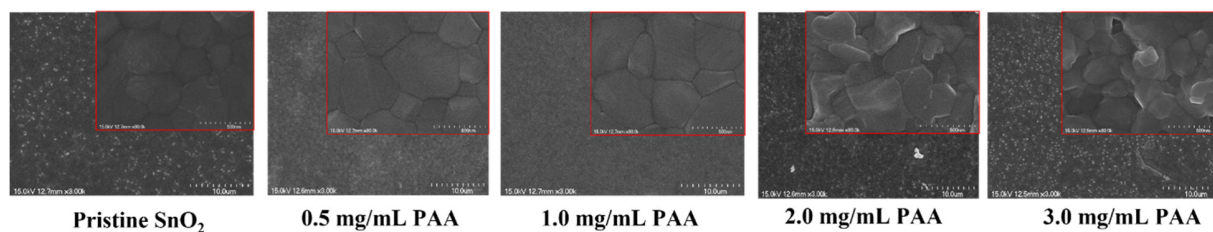

**Fig. S8.** SEM image of the perovskite films grown on pristine SnO<sub>2</sub> and PAA@SnO<sub>2</sub> at various concentrations.

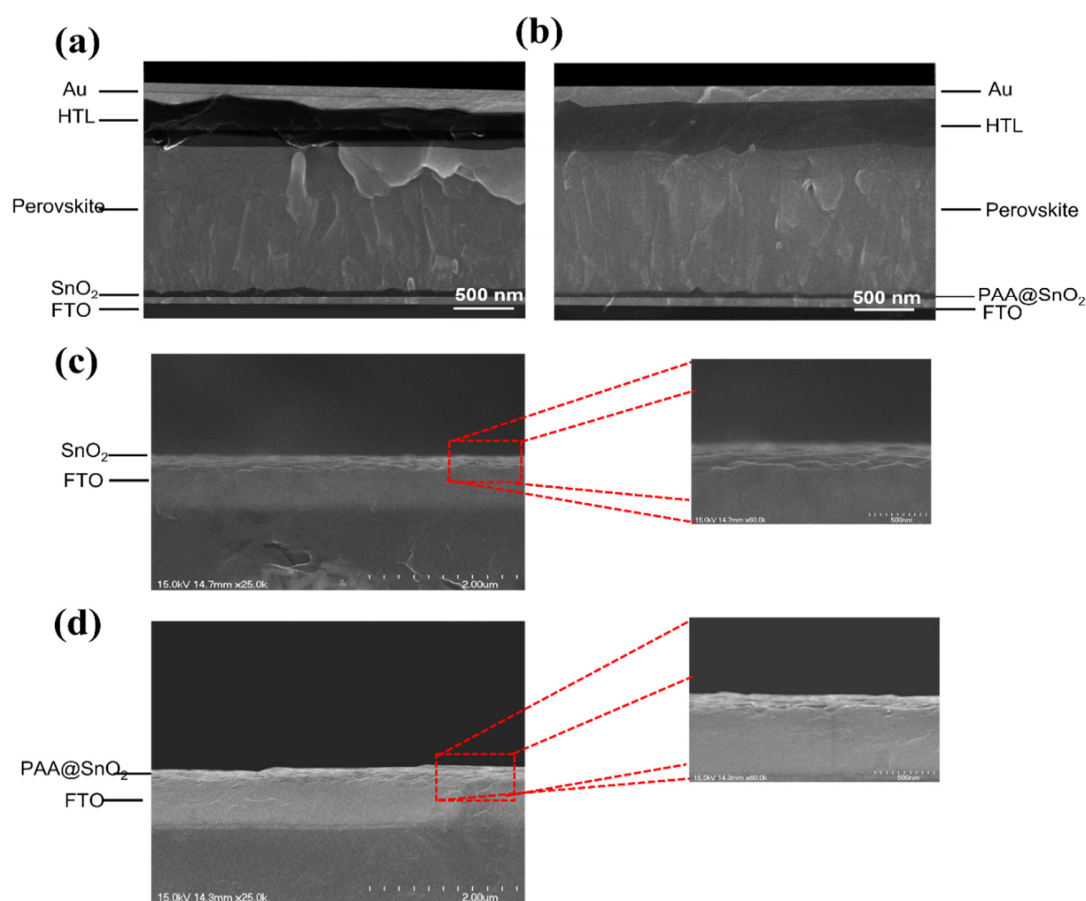

**Fig. S9.** Cross-section SEM images of (a) pristine SnO<sub>2</sub> and PAA@SnO<sub>2</sub> device structure. Cross-section SEM images of ETL with (a) pristine SnO<sub>2</sub> and PAA@SnO<sub>2</sub>.

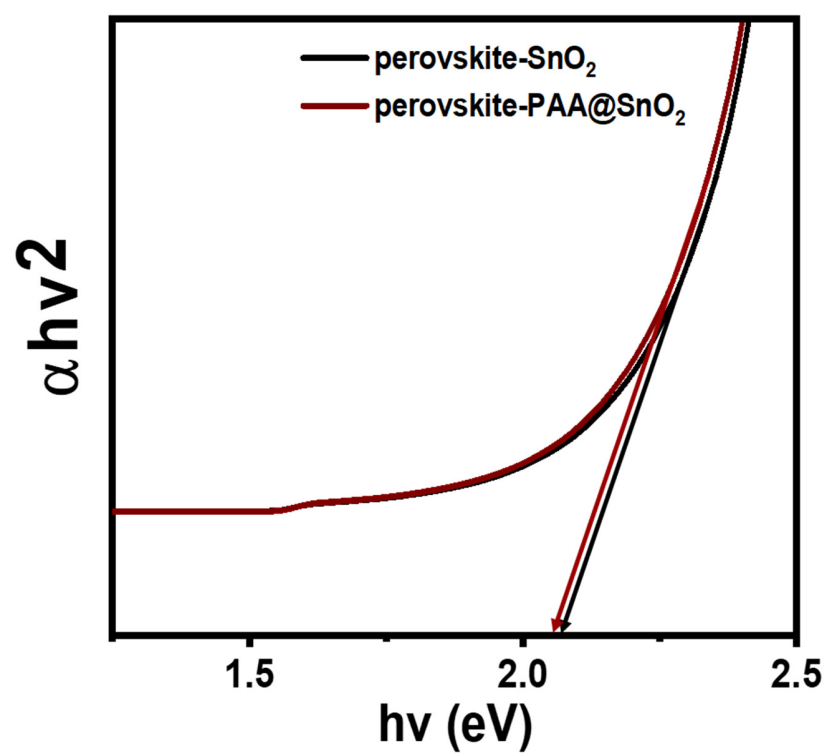

**Fig. S10.** Tauc plot for perovskite on SnO<sub>2</sub> and PAA@SnO<sub>2</sub>



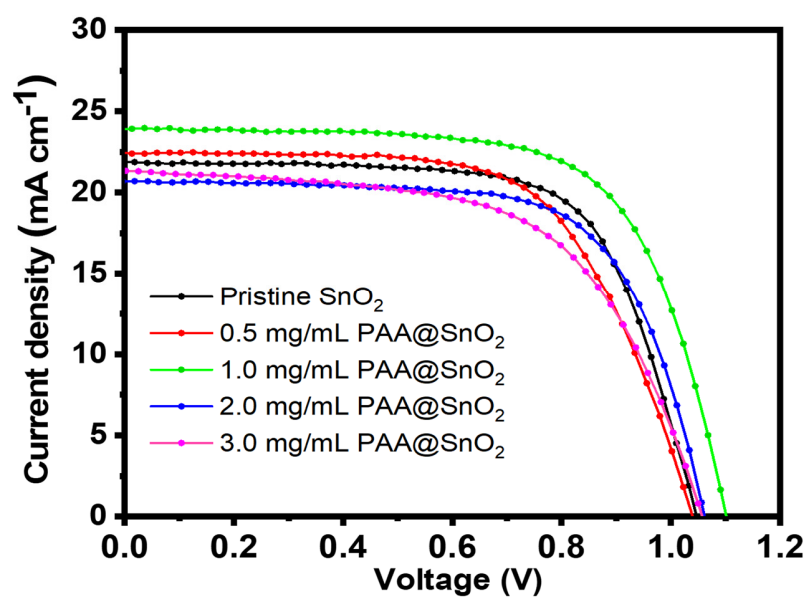

Fig. S11. J–V curves of the PSCs with different ETL substrates.

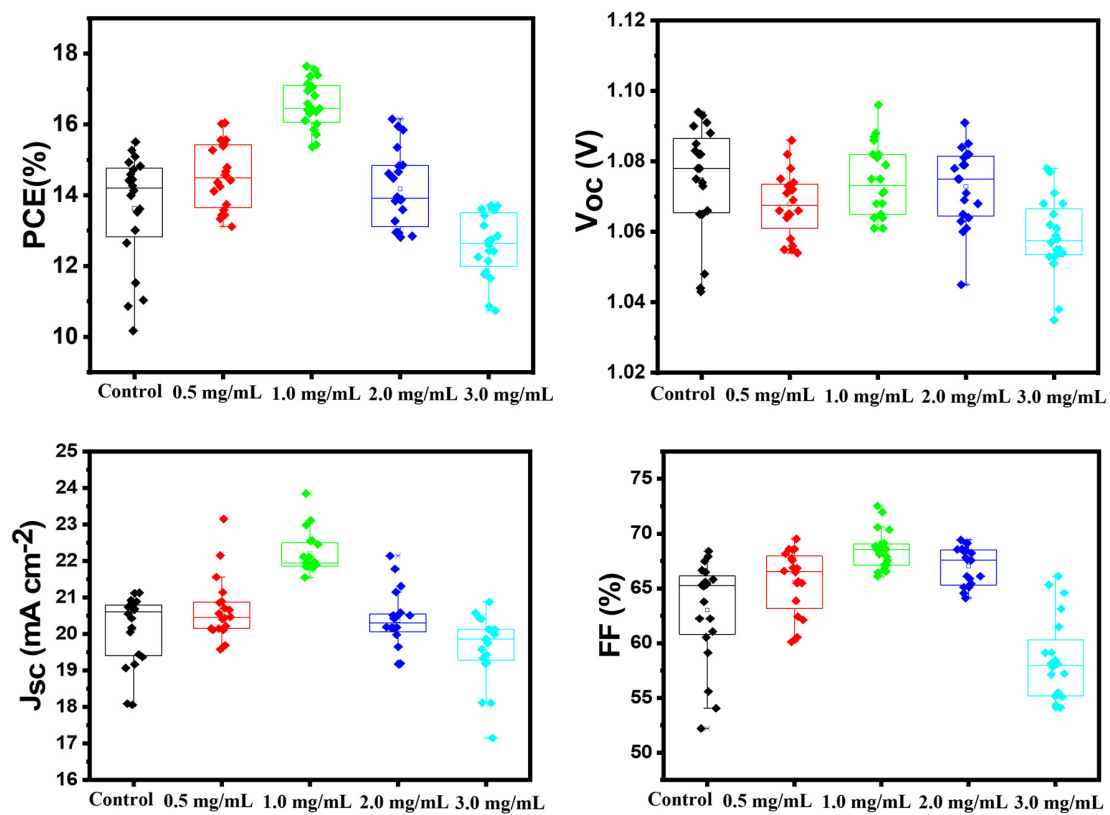

**Fig. S12.** Effects of varying PAA concentration on the photovoltaic parameters, including (a) PCE, (b)  $V_{oc}$ , (c)  $J_{sc}$ , and (d) FF.

**Table S1.** Device performance of perovskite solar cells with SnO<sub>2</sub> or PAA@SnO<sub>2</sub>

| Devices                   | PCE (%) | J <sub>sc</sub> (mA cm <sup>-2</sup> ) | V <sub>oc</sub> (V) | FF (%) |
|---------------------------|---------|----------------------------------------|---------------------|--------|
| Pristine SnO <sub>2</sub> | 15.507  | 21.86                                  | 1.05                | 63.2   |
| 0.5 mg/mL PAA             | 16.046  | 23.15                                  | 1.08                | 69.5   |
| 1.0 mg/mL PAA             | 17.145  | 23.85                                  | 1.08                | 72.5   |
| 2.0 mg/mL PAA             | 16.136  | 22.15                                  | 1.05                | 71.2   |
| 3.0 mg/mL PAA             | 13.821  | 19.82                                  | 1.01                | 62.2   |

**Table S2.** The parameters of 20 devices on pristine SnO<sub>2</sub> and PAA@SnO<sub>2</sub> ETLs.

| SnO <sub>2</sub> | PCE (%) | V <sub>oc</sub> (V) | J <sub>sc</sub> (mA cm <sup>-2</sup> ) | FF    |
|------------------|---------|---------------------|----------------------------------------|-------|
| 1                | 14.441  | 1.074               | 20.69                                  | 0.679 |
| 2                | 11.039  | 1.073               | 21.12                                  | 0.684 |
| 3                | 12.652  | 1.082               | 20.92                                  | 0.675 |
| 4                | 11.528  | 1.065               | 20.17                                  | 0.665 |
| 5                | 13.526  | 1.078               | 20.78                                  | 0.652 |
| 6                | 14.13   | 1.082               | 20.81                                  | 0.655 |
| 7                | 13.995  | 1.085               | 20.74                                  | 0.667 |
| 8                | 13.615  | 1.078               | 20.43                                  | 0.656 |

|                            |                |                           |                                           |              |
|----------------------------|----------------|---------------------------|-------------------------------------------|--------------|
| 9                          | 10.864         | 1.075                     | 20.55                                     | 0.653        |
| 10                         | 13.012         | 1.066                     | 21.13                                     | 0.658        |
| 11                         | 14.421         | 1.043                     | 20.73                                     | 0.654        |
| 12                         | 14.928         | 1.048                     | 20.89                                     | 0.622        |
| 13                         | 14.721         | 1.065                     | 20.66                                     | 0.591        |
| 14                         | 14.819         | 1.091                     | 19.44                                     | 0.611        |
| 15                         | 10.173         | 1.094                     | 20.05                                     | 0.634        |
| 16                         | 15.091         | 1.090                     | 19.07                                     | 0.622        |
| 17                         | 15.506         | 1.088                     | 19.37                                     | 0.541        |
| 18                         | 14.590         | 1.093                     | 19.17                                     | 0.556        |
| 19                         | 14.271         | 1.083                     | 18.09                                     | 0.522        |
| 20                         | 15.277         | 1.044                     | 19.06                                     | 0.605        |
| <b>Mean</b>                | <b>13.629</b>  | <b>1.075</b>              | <b>20.14</b>                              | <b>0.630</b> |
| <b>PAA@SnO<sub>2</sub></b> | <b>PCE (%)</b> | <b>V<sub>oc</sub> (V)</b> | <b>J<sub>sc</sub>(mA cm<sup>-2</sup>)</b> | <b>FF</b>    |
| 1                          | 16.451         | 1.086                     | 23.85                                     | 0.725        |
| 2                          | 15.851         | 1.082                     | 23.11                                     | 0.720        |
| 3                          | 17.145         | 1.087                     | 22.98                                     | 0.706        |
| 4                          | 17.056         | 1.079                     | 22.45                                     | 0.704        |
| 5                          | 15.583         | 1.075                     | 22.56                                     | 0.691        |
| 6                          | 16.456         | 1.081                     | 22.11                                     | 0.685        |
| 7                          | 15.357         | 1.096                     | 22.55                                     | 0.687        |
| 8                          | 16.112         | 1.075                     | 22.12                                     | 0.689        |

|             |              |              |              |              |
|-------------|--------------|--------------|--------------|--------------|
| 9           | 13.352       | 1.071        | 21.86        | 0.686        |
| 10          | 17.641       | 1.082        | 23.55        | 0.686        |
| 11          | 16.312       | 1.088        | 21.94        | 0.681        |
| 12          | 16.415       | 1.064        | 22.85        | 0.665        |
| 13          | 17.551       | 1.065        | 21.81        | 0.672        |
| 14          | 15.423       | 1.068        | 21.86        | 0.671        |
| 15          | 16.015       | 1.061        | 22.91        | 0.679        |
| 16          | 17.361       | 1.068        | 21.85        | 0.689        |
| 17          | 17.391       | 1.07         | 21.89        | 0.675        |
| 18          | 16.811       | 1.065        | 21.94        | 0.667        |
| 19          | 15.711       | 1.064        | 21.98        | 0.665        |
| 20          | 16.951       | 1.061        | 21.95        | 0.661        |
| <b>Mean</b> | <b>16.54</b> | <b>1.074</b> | <b>22.41</b> | <b>0.685</b> |
